# Supplementary material
Source: PubMed Central journal article supplement (PMC384695)
Supplement: pnas_101_12_4059__2.pdf [file pnas_101_12_4059__2.pdf]

A

...TAATACGACTCACTATAGATCTAACTTGTCTTGTGCGCAATCTGCCACA  
*Bgl*III

M M M M M M M M M M M K T G R P S V F T S Q D Y L S D H L W R A  
ATGATGATGATGATGATGATGATGATGAAGACCGGTCGCCCGTCAGTCTTCACTAGTCAGGATTACCTCTCAGACCATCTGTGGAGAGCC  
*Age*I AAT  
(D12N)

L N A K K L L S T L S D L H A H K L R V D P V N F K L L S H  
CTTAACGCGAAGAAGCTTCTGTCTACTCTCAGCGACCTGCACGCGCACAAAGCTGCGGGTGGACCCGGTGAATTTCAAGCTCCTGTCCCAC  
*Hind*III *Acc*I *Bsp*I *Bsm*FI

C L L V T L A N H H P S E F T P A V H A S L D K F L A N V S  
TGCCTGCTGGTGACCCTGGCCAACCACCACCCAGTGAGTTCACCCCTGCGGTGCACGCCTCCCTGGACAAGTTCCTGGCCAACGTGAGC  
*Bst*EII   
FP94

T V L T S K Y R A S N G R P S V F T S Q D Y L S D H L W R A  
ACCGTGCTGACCTCCAAATATCGTGCTAGCAACGGTCGCCCGTCAGTCTTCACTAGTCAGGATTACCTCTCAGACCATCTGTGGAGAGCC  
*Nhe*I AAT  
(D12N)

L N A L Q H P N I F D A G V A G L P D D D A G E L P A A V V  
CTTAACGCGTTGCAACACCCCAACATCTTCGACGCAGGTGTGCGAGGTCTTCCCGACGACGACGCCGGTGAAGTTCCTGGCCAACGTGAGC  
*Mlu*I *Sgr*AI

V L E H G K T L Q E K E I V D Y V A S Q V T T A K K L R G G  
GTTTTGGAGCACGGAAAGACGCTGCAGGAAAAAGAGATCGTGGATTACGTCGCCAGTCAAGTAACAACCGCGAAAAAGTTGCGCGGAGGA  
*Pst*I   
FP93

V V F V D E V P K G L T G K L D A R K I R E I L I K A K K G  
GTTGTGTTTGTGGACGAAGTACCGAAAGGTCTTACCGGAAAACCTGCACGCAAGAAAAATCAGAGAGATCCTCATAAAGCCAAGAAGGGC  
G K I A V \*  
GGAAAGATCGCCGTGTAATTCTAGATAGCTAAAAAAAAAAAAAAAAAAAAAAAAAAAAAAAAATGCATGAATTC...  
*Xba*I *Nsi*I *Eco*RI

B

...TAATACGACTCACTATAGATCTAACTTGTCTTGTTCGCAATCTGCCACA  
*Bgl*II

M M M M M M M M M M K T G R P S V F T S Q D Y L S D H L W R A  
ATGATGATGATGATGATGATGATGATGAAGACCGGTCGCCCGTCAGTCTTCACTAGTCAGGATTACCTCTCAGACCATCTGTGGAGAGCC  
*Age*I AAT  
(D12N)

L N A K K L L Q H P N I F D A G V A G L P D D D A G E L P A  
CTTAACGCGAAGAAGCTTTTGTCAACACCCCAACATCTTCGACGCAGGTGTTCGCAGGTCTTCCCGACGACGACGCCGGTGAAGTCTCCCGCC  
*Hind*III

A V V V L E H G K T L Q E K E I V D Y V A S Q V T T A K K L  
GCCGTTGTTGTTTTGGAGCACGGAAAGACGCTGCAGGAAAAAGAGATCGTGGATTACGTCCGAGTCAAGTAACAACCGCGAAAAAGTTG  
*Pst*I

R G G V V F V D E V P K G L T G K L D A R K I R E I L I K A  
CGCGGAGGAGTTGTGTTTGTGGACGAAGTACCGAAAGGTCTTACCGGAAACTCGACGCAAGAAAAATCAGAGAGATCCTCATAAAGGCC

K K G G K I A V A S N G R P S V F T S Q D Y L S D H L W R A  
AAGAAGGGCGAAAGATCGCCGTGGCTAGCAACGGTCGCCCGTCAGTCTTCACTAGTCAGGATTACCTCTCAGACCATCTGTGGAGAGCC  
*Nhe*I AAT  
(D12N)

L N A L Q H P N I F D A G V A G L P D D D A G E L P A A V V  
CTTAACGCGTTGCAACACCCCAACATCTTCGACGCAGGTGTTCGCAGGTCTTCCCGACGACGACGCCGGTGAAGTCTCCCGCCGCGTTGTT  
*Mlu*I

V L E H G K T L Q E K E I V D Y V A S Q V T T A K K L R G G  
GTTTTGGAGCACGGAAAGACGCTGCAGGAAAAAGAGATCGTGGATTACGTCCGAGTCAAGTAACAACCGCGAAAAAGTTGCGCGGAGGA  
*Pst*I

V V F V D E V P K G L T G K L D A R K I R E I L I K A K K G  
GTTGTGTTTGTGGACGAAGTACCGAAAGGTCTTACCGGAAACTCGACGCAAGAAAAATCAGAGAGATCCTCATAAAGGCCAAGAAGGGC

G K I A V \*  
GGAAAGATCGCCGTGTAATTCTAGATAGCTAAAAAAAAAAAAAAAAAAAAAAAAAAAAAAAAATGCATGAATTC...  
*Xba*I *Nsi*I *Eco*RI
